# Supplementary material for: The role of long-term power-law memory in controlling large-scale dynamical networks
Source: PubMed Central journal article supplement (PMC10636034; doi:10.1038/s41598-023-46349-9), 2023-11-09
Supplement: 41598_2023_46349_MOESM1_ESM.pdf [file 41598_2023_46349_MOESM1_ESM.pdf]

# Supplementary Material of The Role of Long-Term Power-Law Memory in Controlling Large-Scale Dynamical Networks

Emily A. Reed, Guilherme Ramos, Paul Bogdan, and Sérgio Pequito

## Contents

1 **1 Methods** 1

2 **2 Extra Experiments** 7

## 1 Methods

### Problem Statement

We consider a fractional-order dynamical network driven by a control input and additive noise. It is described as follows:

$$\Delta^\alpha \mathbf{x}[k+1] = A\mathbf{x}[k] + B\mathbf{u}[k], \quad (1)$$

where  $k \in \mathbb{N}$  is the time step,  $n$  is the number of nodes in the network,  $x[k] \in \mathbb{R}^n$  denotes the state,  $A \in \mathbb{R}^{n \times n}$  is the coupling matrix that describes the spatial relationship between different states,  $\mathbf{u}[k] \in \mathbb{R}^n$  is the input vector,  $B \in \mathbb{R}^{n \times n}$  is the coupling matrix that describes the spatial relationship between the inputs and the states,  $\alpha \in \mathbb{R}^n$  are the fractional-order exponents encoding the memory associated with the different state variables, and  $\Delta^\alpha$  is the Grünwald-Letnikov discretization of the fractional derivative (Chpt.2,[1]). Fractional-order dynamical networks possess long-term memory. For each  $i$ -th state ( $1 \leq i \leq n$ ), the fractional-order operator acting on  $x_i$  leads to the following expression:

$$\Delta^{\alpha_i} x_i[k] = \sum_{j=0}^k \psi(\alpha_i, j) x_i[k-j], \quad (2)$$

where  $\psi(\alpha_i, j) = \frac{\Gamma(j-\alpha_i)}{\Gamma(-\alpha_i)\Gamma(j+1)}$ , with  $\Gamma(\cdot)$  denoting the Gamma function [2].

We aim to determine the minimum number of state nodes and their placement that need to be driven to ensure the structural controllability of the fractional-order dynamical network. A fractional-order dynamical network is said to be *controllable* if there exists a sequence of inputs such that any initial state of the system can be steered to any desired state in a finite number of time steps. Therefore, assuming that the system is being actuated during  $T$  time steps, we can describe the system (1) by the matrix tuple  $(\alpha, A, B, T)$ .

Controllability associated with the system described in (1) can be characterized as follows.

**Definition 1.** (*Controllability in  $T$  time steps*) *The fractional-order dynamical network described by  $(\alpha, A, B, T)$  is said to be controllable in  $T$  time steps if and only if there exists a sequence of inputs  $\mathbf{u}[k]$  ( $0 \leq k \leq T-1$ ) such that any initial state  $\mathbf{x}[0] \in \mathbb{R}^n$  can be steered to any desired state  $(\mathbf{x}_{desired}[T] \in \mathbb{R}^n)$  in  $T$  time steps. ◻*

Next we provide the following result on the controllability of the linear discrete-time fractional-order dynamical network.

**Theorem 1.** (Controllability of fractional-order dynamical network (Theorem 4, [3])) The linear discrete-time fractional-order dynamical network is controllable if and only if there exists a finite time  $K$  such that  $\text{rank}(W_c(0, K)) = N$ , the dimension of the state, where  $W_c(0, K) = G_K^{-1} \sum_{j=0}^{K-1} G_j B B^\top G_j^\top G_K^{-\top}$  and

$$G_k = \begin{cases} I_n, & k = 0 \\ \sum_{j=0}^{k-1} A_j G_{k-1-j}, & k \geq 1, \end{cases} \quad (3)$$

where  $I_n$  is the identity matrix of size  $n$ . ◦

Furthermore, an input sequence  $[\mathbf{u}^\top[K-1], \mathbf{u}^\top[K-2], \dots, \mathbf{u}^\top[0]]^\top$  that transfers  $\mathbf{x}[0] \neq 0$  to  $\mathbf{x}[K] = 0$  is given by

$$\begin{bmatrix} \mathbf{u}[K-1] \\ \mathbf{u}[K-2] \\ \vdots \\ \mathbf{u}[0] \end{bmatrix} = -[G_0 B G_1 B \dots G_{K-1} B]^\top G_K^{-\top} W_c^{-1}(0, K) \mathbf{x}[0]. \quad (4)$$

Due to the uncertainty in the system's parameters, we adopt a structural systems approach that relies solely on the system's parameters. Consider the class of possible tuples with a predefined structure  $([\bar{\alpha}], [\bar{A}], [\bar{B}], T)$ , with  $[\bar{\alpha}] = \{\alpha \in \mathbb{R}^n\}$ , where a structural matrix is defined as  $[\bar{M}] = \{M \in \mathbb{R}^{m_1 \times m_2} : M_{i,j} = 0 \text{ if } M_{i,j} = 0\}$ , and  $\bar{M} \in \{0, \star \in \mathbb{R}\}^{m_1 \times m_2}$  is a structural matrix with fixed zeros and arbitrary scalar parameters. Specifically, in the context of this paper, we seek to assess the *structural controllability* defined as follows:

**Definition 2.** (Structural Controllability): The fractional-order dynamical network with structural pattern  $(\bar{\alpha}, \bar{A}, \bar{B}, T)$  is said to be structurally controllable in  $T$  time steps if and only if there exists a tuple  $(\alpha', A', B', T) \in ([\bar{\alpha}], [\bar{A}], [\bar{B}], T)$  that is controllable in  $T$  time steps. ◦

**Remark 1.** If a system is structurally controllable, then almost all  $(\alpha'', A'', B'', T) \in ([\bar{\alpha}], [\bar{A}], [\bar{B}], T)$  are controllable in  $T$  time steps, by invoking similar density arguments to those in [4]. ◊

From the above discussion, it readily follows that structural controllability will depend on the system's structure and actuation capabilities being deployed. We consider the following assumption:

**A1:** All state variables can be directly controlled by dedicated actuators (i.e., there is a one-to-one mapping between an actuator and a state variable). Thus, the input matrix  $\mathbb{I}_n^\mathcal{J} \in \mathbb{R}^{n \times n}$ , where  $\mathcal{J} = \{1, \dots, n\}$  is the set of all state variables, is a diagonal matrix such that any diagonal entry is non-zero (i.e.,  $\mathbb{I}_n^\mathcal{J}(i, i) \neq 0$  where  $i = \{1, \dots, n\}$ ) if and only if the associated actuator (i.e.,  $u_i$ ) is connected to the associated state variable (i.e.,  $x_i$ ). Hence, the minimum set of state variables that need to be connected to dedicated actuators to ensure structural controllability is denoted by  $\mathcal{J}^* \subseteq \mathcal{J}$ .

Formally, we seek the solution  $\mathcal{J}^*$  to the following problem: given  $(\bar{\alpha}, \bar{A})$  and a time horizon  $T$  time steps

$$\begin{aligned} \min_{\mathcal{J} \subseteq \{1, \dots, n\}} & |\mathcal{J}| \\ \text{s.t. } & (\bar{\alpha}, \bar{A}, \mathbb{I}_n^\mathcal{J}, T) \\ & \text{is structurally controllable in } T \text{ time steps.} \end{aligned} \quad (\mathbf{P}_1)$$

## Structural Controllability of Fractional-Order Dynamical Networks

We will start by first providing the graph-theoretical necessary and sufficient conditions to ensure structural controllability in  $T$  time steps of fractional-order dynamical networks. With these conditions, we will solve  $\mathbf{P}_1$  and provide a characterization of all the minimum combinations of state variables that satisfy these conditions.

Let us start by recalling that the fractional-order dynamical network in (2) can be written as follows [5]:

$$x[k+1] = Ax[k] - \sum_{j=1}^{k+1} D(\alpha, j)x[k+1-j] + Bu[k], \quad (5)$$

where

$$D(\alpha, j) = \begin{bmatrix} \psi(\alpha_1, j) & 0 & \dots & 0 \\ 0 & \psi(\alpha_2, j) & \dots & 0 \\ 0 & \dots & \ddots & 0 \\ 0 & 0 & \dots & \psi(\alpha_n, j) \end{bmatrix}.$$

58 In fact, it admits a compact representation given by

$$x[k+1] = \sum_{j=0}^k A_j x[k-j] + Bu[k], \quad (6)$$

59 where  $A_0 = A - D(\alpha, 1)$  and  $A_j = -D(\alpha, j+1)$ , for  $j \geq 1$ . Thus, the fractional-order dynamical network  
60 can be re-written in a closed-form as follows:

$$x[k] = G_k x[0] + \sum_{j=0}^{k-1} G_{k-1-j} Bu[j], \quad (7)$$

with

$$G_k = \begin{cases} I_n, & k = 0 \\ \sum_{j=0}^{k-1} A_j G_{k-1-j}, & k \geq 1, \end{cases} \quad (8)$$

61 Hereafter, the following remark will play a key role.

62 **Remark 2.** The matrix  $G_k$  in (8) corresponds to the transition matrix  $\Phi(k, 0)$  of the fractional-order dy-  
63 namical network. In particular,  $G_k$  is a combination of the powers of  $A_0$  and diagonal matrices that depend  
64 on the fractional-order exponents. For example,

$$\begin{aligned} G_3 &= \sum_{j=0}^2 A_j G_{2-j} = A_0 G_2 + A_1 G_1 + A_2 G_0 \\ &= A_0^3 - A_0 D(\alpha, 2) - D(\alpha, 2) A_0 - D(\alpha, 3). \quad \diamond \end{aligned}$$

65 To provide necessary and sufficient graph-theoretical conditions, we need to introduce the following ter-  
66 minology. A *directed graph* (digraph) is described by  $\mathcal{G} = (\mathcal{V}, \mathcal{E})$ , where  $\mathcal{V}$  denotes the set of vertices (or  
67 nodes) and  $\mathcal{E}$  the (directed) edges between the vertices in the graph. A *walk* is any sequence of edges where  
68 the last vertex in one edge is the beginning of the next edge. Notice that a walk may include the repetition  
69 of vertices. As such, a *path* is a walk where vertices are not repeated. If the beginning and ending vertex  
70 of a path is the same, then we obtain a *cycle*. Additionally, a *sub-digraph*  $\mathcal{G}_s = (\mathcal{V}', \mathcal{E}')$  is described as any  
71 subcollection of vertices  $\mathcal{V}' \subset \mathcal{V}$  and the edges between them (i.e.,  $\mathcal{E}' \subset \mathcal{E}$ ). If a subgraph has the property  
72 that there exists a path between any two pairs of vertices in the subgraph, then it is a *strongly connected*  
73 *digraph*. The maximal strongly connected subgraph forms a *strongly connected component (SCC)*, and any  
74 digraph can be uniquely decomposed into SCCs that can be seen as nodes in a directed acyclic digraph. A  
75 *source SCC* is an SCC that does not possess incoming edges to its vertices from other SCCs.

76 Now, we introduce the following notion of *structural equivalence*, which will play a key role in the derivation  
77 of our main results.

78 **Definition 3.** (*Structural Equivalence*) Let  $\bar{M}$  and  $\bar{N}$  be two  $n \times n$  structural matrices. A structural matrix  
79  $\bar{M}$  dominates  $\bar{N}$  if  $\bar{N}_{i,j} = \star$ , then  $\bar{M}_{i,j} = \star$  for all  $i, j \in \{1, \dots, n\}$ , which we denote as  $\bar{M} \geq \bar{N}$ . Also, if  
80  $\bar{M} \geq \bar{N}$  and  $\bar{N} \geq \bar{M}$ , then we say that  $\bar{M}$  is structurally equivalent to  $\bar{N}$ .  $\circ$

We define a Markov network as a linear time-invariant system given as follows

$$x[k+1] = Ax[k],$$

81 where  $A \in \mathbb{R}^{n \times n}$  may or may not possess self-loops on all the nodes.

82

83 We notice that for  $A_j$ , if  $j = 0$ , then we obtain a system dependent on  $A_0 = A - D(\alpha, 1)$ ; however, the  
 84 linear time-invariant system is only dependent on  $A$ , where  $A$  may or may not possess self-loops on all the  
 85 nodes. When  $A$  does not possess self-loops, then we can obtain an advantage in terms of minimal amount  
 86 of control resources needed for controlling networks possessing fractional-order dynamics. Now, we provide  
 87 the first main result of our paper.

88 **Theorem 2.** (*Structural equivalence of fractional-order dynamical networks to linear time-invariant dynamical networks*)  
 89 The structural fractional-order dynamical network  $(\bar{\alpha}, \bar{A})$  described by its transition matrix  $\bar{G}_k$   
 90 in (7) and (8) is structurally equivalent to the structural linear time-invariant dynamical network described  
 91 by system matrix  $\bar{A}_0$ , where  $A_0 = A - D(\alpha, 1)$ .  $\square$

92 *Proof.* First recall Remark 2, and notice that if we consider  $G_k$  in (8), then we obtain a combination of the  
 93 powers of  $A_0$  and diagonal matrices that depend on the fractional-order exponents. In fact, some of the  
 94 powers of  $A_0$  might be multiplied on the left or right by these diagonal matrices, which does not change the  
 95 structural pattern of the outcome (i.e.,  $DA_0^k$  or  $A_0^k D$  is structurally equivalent to  $\bar{A}_0^k$ , where  $D$  is a diagonal  
 96 matrix). Therefore,  $\bar{G}_k$  structurally equivalent to  $\bar{A}_0^k$ . For a linear time-invariant system having system  
 97 matrix  $A_0$ , the state transition is described by  $x[k] = A_0^k x[0] + \sum_{j=0}^{k-1} A_0^{k-j-1} B u[j]$ . By comparing this  
 98 state transition relationship with the state transition relationship in (7) and because  $\bar{G}_k$  in (8) structurally  
 99 equivalent to  $\bar{A}_0^k$ , then the structural fractional-order dynamical network described by  $\bar{G}_k$  is structurally  
 100 equivalent to the structural linear time-invariant network described by system matrix  $\bar{A}_0$ .  $\square$

101 Next, we show that the structural matrix  $\bar{A}_0$  has non-zero diagonal generically.

102 **Theorem 3.** (*Generic non-zero diagonal*) The structural matrix  $\bar{A}_0$  has non-zero diagonal generically.

103 *Proof.* We have by definition that  $A_0 = A - D(\alpha, 1)$ . A non-zero diagonal entry may appear in  $A_0$  if there  
 104 exists an  $i \in \{1, \dots, n\}$  such that  $\alpha_i = 0$  and if the corresponding diagonal entry of  $A$  is zero (i.e.,  $a_{i,i} = 0$ ).  
 105 Another instance occurs if there exists an  $i \in \{1, \dots, n\}$  such that  $a_{i,i} \neq 0$ , but a given combination of  
 106 parameters due to  $\alpha_i \neq 0$  results in a perfect cancellation of the diagonal entry. These two cases occur with  
 107 probability zero (whenever they are uniformly sampled on  $\mathbb{R}$  or  $\mathbb{C}$ ) by invoking density arguments. Hence,  
 108 the matrix  $\bar{A}_0$  has non-zero diagonal entries generically.  $\square$

109 From Theorems 2 and 3, given the structural characterization, we can associate fractional-order dynamical  
 110 networks, characterized by  $(\alpha, A, B)$ , with a *system digraph*  $\mathcal{G} \equiv \mathcal{G}(\bar{A}_0, \bar{B}) = (\mathcal{V}, \mathcal{E})$ , where  $\mathcal{V} = \mathcal{X} \cup \mathcal{U}$  where  
 111  $\mathcal{X} = \{x_1, \dots, x_n\}$  and  $\mathcal{U} = \{u_1, \dots, u_n\}$  are the state and input vertices, respectively. Furthermore, we have  
 112 that  $\mathcal{E} = \mathcal{E}_{\mathcal{X}, \mathcal{X}} \cup \mathcal{E}_{\mathcal{X}, \mathcal{U}}$ , where  $\mathcal{E}_{\mathcal{X}, \mathcal{X}} = \{(x_j, x_i) : \bar{A}_0(i, j) \neq 0\}$  and  $\mathcal{E}_{\mathcal{X}, \mathcal{U}} = \{(x_j, u_i) : \bar{B}(i, j) \neq 0\}$  are the state  
 113 and input edges, respectively. Similarly, we can define the *state digraph*  $\mathcal{G}(\bar{A}_0) = (\mathcal{X}, \mathcal{E}_{\mathcal{X}, \mathcal{X}})$ , characterized  
 114 by  $(\alpha, A)$ .

115 **Remark 3.** We remark that due to the structural equivalence notion introduced in this paper we observe that  
 116 the fractional-order exponents play an important role in capturing the memory of the state variables, which  
 117 is structurally equivalent to nodal dynamics in a linear time-invariant system. Ultimately, by Theorems 2  
 118 and 3, considering fractional-order dynamics leads to a system digraph with self-loops almost always.  $\diamond$

119 Subsequently, by invoking Theorem 2, we provide the graphical conditions that ensure structural control-  
 120 lability of fractional-order dynamical networks.

121 **Theorem 4.** (*Structural controllability for fractional-order dynamical networks*) Given a structural fractional-  
 122 order dynamical network  $(\bar{\alpha}, \bar{A}, \bar{B}, T = n)$ , we say that this network is structurally controllable in  $T = n$  time  
 123 steps if and only if at least one state variable in each of the source SCCs of  $\mathcal{G}(\bar{A}_0)$  is connected to an incoming  
 124 input in the system digraph  $\mathcal{G}(\bar{A}_0, \bar{B})$ .  $\square$

125 *Proof.* From Theorems 2 and 3, it follows that we only need to guarantee that the linear time-invariant  
126 network described by  $(\bar{A}_0, \bar{B})$  is structurally controllable. Therefore, to attain structural controllability of  
127  $(\bar{A}_0, \bar{B})$ , we need to guarantee two conditions on  $\mathcal{G}(\bar{A}_0, \bar{B})$  [6]: (i) all state variables belong to a disjoint  
128 union of cycles, and (ii)  $\mathcal{G}(\bar{A}_0, \bar{B})$  has at least one state variable in each of the source SCCs of  $\mathcal{G}(\bar{A}_0)$  that is  
129 connected to an incoming input. Notice that the first condition is fulfilled since all the states have self-loops  
130 generically – see Remark 3. Subsequently, it suffices to guarantee structural controllability of the fractional-  
131 order dynamical network if and only if  $\mathcal{G}(\bar{A}_0, \bar{B})$  has at least one state variable in each of the source SCCs  
132 of  $\mathcal{G}(\bar{A}_0)$  that is connected to an incoming input.  $\square$

## 133 Minimal Dedicated Actuation to Ensure Structural Controllability of 134 Fractional-Order Dynamical Networks

135 With the result in Theorem 4, we readily obtain the following corollary required for ensuring the feasibility  
136 of  $\mathbf{P}_1$ .

137 **Corollary 1.** *A fractional-order dynamical network  $(\bar{\alpha}, \bar{A}, \bar{\mathbb{I}}_n^{\mathcal{J}}, T = n)$  is structurally controllable if and only  
138 if  $\mathcal{J}$  contains the index of at least one state variable in each of the source SCCs in  $\mathcal{G}(\bar{A}_0)$ .  $\circ$*

139 *Proof.* The result follows from invoking Theorem 4. Therefore, by guaranteeing that at least one state per  
140 source SCC is actuated, we guarantee that  $\mathcal{G}(\bar{A}_0, \bar{\mathbb{I}}_n^{\mathcal{J}})$  is accessible and hence, structurally controllable.  $\square$

141 Consequently, we obtain the solution to  $\mathbf{P}_1$ .

142 **Theorem 5.** *(Solution to  $\mathbf{P}_1$ ) Consider a fractional-order dynamical networks  $(\bar{\alpha}, \bar{A}, \bar{\mathbb{I}}_n^{\mathcal{J}}, T = n)$ . The  
143 solution to  $\mathbf{P}_1$  is as follows:*

$$\mathcal{J}^* = \{i_1, \dots, i_l\},$$

144 where  $\{i_1, \dots, i_l\}$  denotes the set of indices corresponding to the  $l$  states  $x_{i_1}, \dots, x_{i_l}$  that each belong to a  
145 different source SCC in  $\mathcal{G}(\bar{A}_0)$ .  $\circ$

146 *Proof.* First, notice that Corollary 1 establishes the feasibility of the solution to  $\mathbf{P}_1$ . Therefore, to achieve  
147 the minimum feasible set, we select one state variable from each of the different source SCCs in  $\mathcal{G}(\bar{A}_0)$  to be  
148 actuated. The minimal number of variables is equal to the number of source SCCs, and hence, the result  
149 follows.  $\square$

150 **Theorem 6.** *Any network modeled as a fractional-order system as in (1) requires less than or equal to the  
151 number of driven nodes than that of the same network possessing linear time-invariant dynamics.*

152 *Proof.* Based on the results in Theorem 5 and the results in [7], linear time-invariant networks have one more  
153 additional condition to verify structural controllability than the sole condition required for fractional-order  
154 networks. Therefore, a network possessing linear time-invariant dynamics must have the same or more total  
155 number of driven nodes than the equivalent topological network possessing fractional-order dynamics.  $\square$

156 Finally, we provide the computational-time complexity for solving  $\mathbf{P}_1$ .

157 **Theorem 7.** *The computational-time complexity of the solution to  $\mathbf{P}_1$  is given as  $\mathcal{O}(n^2)$ .*

158 *Proof.* Based on Theorem 5, the solution to  $\mathbf{P}_1$  depends on finding the source strongly connected com-  
159 ponents. Tarjan’s algorithm finds all the strongly connected components in a directed network with a  
160 computational-time complexity of  $\mathcal{O}(|\mathcal{V}| + |\mathcal{E}|)$  [8], where  $\mathcal{V}$  is the number of vertices and  $\mathcal{E}$  is the num-  
161 ber of edges in the network. Hence, by performing another pass of depth-first search, which also has a  
162 computational-time complexity of  $\mathcal{O}(|\mathcal{V}| + |\mathcal{E}|)$ , then the strongly connected components that do not have  
163 an incoming edge can be identified, which are the source strongly connected components. We notice that  
164  $\mathcal{E} \subseteq \mathcal{V} \times \mathcal{V}$ . Hence,  $\mathcal{O}(|\mathcal{V}| + |\mathcal{E}|) = \mathcal{O}(|\mathcal{V}|^2) = \mathcal{O}(n^2)$ , and the result follows.  $\square$

165 **Minimal Dedicated Actuation to Ensure Structural Controllability of**  
 166 **Fractional-Order Dynamical Networks in a Given Number of Time Steps  $T < n$**

167 Next, we will provide the solution to find the minimum combination of state variables that ensure the  
 168 structural controllability of fractional-order dynamical networks with a given number of time steps  $T < n$ ,  
 169 which is written as follows

$$\begin{aligned} & \min_{\mathcal{J} \subseteq \{1, \dots, n\}} |\mathcal{J}| \\ & \text{s.t. } (\bar{\alpha}, \bar{A}, \bar{\mathbb{I}}_n^{\mathcal{J}}, T < n) \text{ is structurally controllable.} \end{aligned} \tag{P}_2$$

170 In the next result, we provide a solution to  $\mathbf{P}_2$ .

171 **Theorem 8.** *(Structural controllability for fractional-order dynamical networks with a given horizon  $T < n$ )*  
 172 *A fractional-order dynamical network  $(\bar{\alpha}, \bar{A}, \bar{B}, T < n)$ , is structurally controllable for a given horizon  $T < n$*   
 173 *if and only if the following two conditions are satisfied:*

- 174 1. *there is at least one state variable in each source SCC in  $\mathcal{G}(\bar{A}_0)$  connected to an input, and*
- 175 2. *the length of the longest shortest path from the starting node of any source SCC in  $\mathcal{G}(\bar{A}_0, \bar{B})$  is less*  
 176 *than or equal to  $T$ .*

177 ◦

178 *Proof.* The first condition follows directly from Theorem 4. The second condition ensures that the system is  
 179 controllable in  $T < n$  time steps since the network can only communicate information as fast as the longest  
 180 shortest path from the input to the last node in the network. □

181 While Theorem 8 does provide an exact solution to  $\mathbf{P}_2$ , this solution is NP-hard. We prove this claim in  
 182 the next result.

183 **Theorem 9.** *Problem  $\mathbf{P}_2$  is NP-hard.*

184 *Proof.* We need to show that there exists a polynomial reduction from a problem known to be NP-hard to our  
 185 problem. The known NP-hard problem that we consider is the graph partitioning problem [9], which aims to  
 186 determine the minimum decomposition of  $\mathcal{G} = (\mathcal{V}, \mathcal{E})$  into  $p$  connected directed subgraphs  $\mathcal{G}_i = (\mathcal{V}_i, \mathcal{E}_i)$ , with  
 187  $i \in \{1, \dots, p\}$  such that  $|\mathcal{V}_i| \leq T$ ,  $\mathcal{V}_i \cap \mathcal{V}_j = \emptyset$  for  $i \neq j$  and  $\bigcup_{i=1}^p \mathcal{V}_i = \mathcal{V}$ . If we partition the network  $\mathcal{G}(\bar{A}_0)$   
 188 into  $p$  subgraphs such that each subgraph has  $|\mathcal{V}_i| \leq T$ , then we can ensure that the longest shortest path  
 189 from the starting node of any source SCC in each subgraph is less than or equal to  $T$  because each subgraph  
 190 has at most  $T$  nodes, which satisfies condition 2 in Theorem 8. Furthermore, the source SCCs can be found  
 191 in polynomial time [10], which satisfies condition 1 of Theorem 8. Together, this method provides a solution  
 192 to  $\mathbf{P}_2$ . Hence, our problem is at least as difficult as the graph partitioning problem, which is known to be  
 193 NP-hard, so  $\mathbf{P}_2$  is NP-hard. □

194 Since  $\mathbf{P}_2$  cannot be solved exactly, we propose an approximated solution to  $\mathbf{P}_2$ , which is employed in our  
 195 simulations and shown in Algorithm 1. Briefly, Algorithm 1 takes a fractional-order dynamical network and  
 196 a given number of time steps  $T < n$  and finds the minimum set of state variables  $\mathcal{J}$  to ensure structural  
 197 controllability. First, the algorithm computes the digraph from the fractional-order dynamical network.  
 198 Next, the software package METIS [9] is used to partition the graph into  $\lceil \frac{n}{T} \rceil$  subgraphs of roughly equal  
 199 size  $T$ . Finally, all of the source SCCs are found in each subgraph, and a single node from each source SCC  
 200 is added to the set  $\mathcal{J}$ .

201 Next, we provide an lower-bound on the optimal solution to  $\mathbf{P}_2$ .

---

**Algorithm 1:** Find the minimum set of state variables  $\mathcal{J}$  to ensure structural controllability of fractional-order dynamical networks for a given time horizon  $T < n$

---

**Input:** Fractional-Order Dynamical Network  $(\bar{\alpha}, \bar{A}, T)$  and network size  $n$

**Output:** The set of state variables denoted by  $\mathcal{J} \subseteq \{1, \dots, n\}$

**Initialization:** Compute  $\mathcal{G}(\bar{A}_0)$  from the fractional-order dynamical network  $(\bar{\alpha}, \bar{A}, T)$  and network size  $n$

**Step 1:** Using METIS [9], partition the digraph  $\mathcal{G}(\bar{A}_0)$  into  $\lceil \frac{n}{T} \rceil$  partitions denoted by  $\mathcal{G}_i = (\mathcal{V}_i, \mathcal{E}_i)$ , where each partition is roughly equal sized, i.e.  $|\mathcal{V}_i| \leq T$ .

**Step 2:** Find all the source SCCs  $\mathcal{S}_{i,j}$  in each partition  $\mathcal{G}_i$ , where  $j$  is the index of all the source SCCs in subgraph  $\mathcal{G}_i$

**Step 3:** Add one state from each source SCC  $\mathcal{S}_{i,j}$  to the set  $\mathcal{J}$ .

---

202 **Theorem 10.** *The minimum number of driven nodes  $d$  required to solve  $\mathbf{P}_2$  for a given time horizon  $T$  is*  
 203 *given by the following inequality:*

$$d \geq \left\lceil \frac{n}{T} \right\rceil. \quad (9)$$

204 *Proof.* When partitioning the graph into subgraphs, we ensure each subgraph has  $|\mathcal{V}_i| \leq T$ . Therefore, there  
 205 are a maximum of  $\lceil \frac{n}{T} \rceil$  subgraphs. Each subgraph can have a minimum of only one source SCC, so the  
 206 lower-bound on the number of driven nodes is equal to the number of subgraphs, i.e.,  $\lceil \frac{n}{T} \rceil$ .  $\square$

207 Finally, we present the computational-time complexity of Algorithm 1.

208 **Theorem 11.** *The computational-time complexity of Algorithm 1 is given as  $\mathcal{O}(n^2 \log(n))$ .*

209 *Proof.* The complexity of this sequential algorithm is determined by the step that has the maximum  
 210 computational-time complexity. The initialization step has a complexity of  $\mathcal{O}(n^2)$  since we construct the  
 211 network from its adjacency matrix  $\bar{A}_0$ . Step 1 has a computational time-complexity of  $\mathcal{O}(n^2 \log(n))$  [11].  
 212 Step 2 has a computational-time complexity of  $\mathcal{O}(n^2)$  [8]. Step 3 has a computational-time complexity of  
 213  $\mathcal{O}(n)$  since we select a single node out of all the nodes in a source SCC, which could be possibly  $n$  nodes.  
 214 Hence, Step 1 has the largest computational-time complexity, so this dictates the overall complexity of the  
 215 algorithm, and the result follows.  $\square$

## 216 2 Extra Experiments

217 We investigate the relationship between the average degree and the average difference in the required number  
 218 of driven nodes for the three random networks. The results are shown in Figure 1. With the exception of  
 219 the Watt-Strogatz networks, which have the same degree for each of the generated networks, the average  
 220 difference in the required number of driven nodes stays relatively similar as the average degree of the network  
 221 increases.

222 We examine the rat brain network since this gave the highest difference in required number of driven  
 223 nodes. In particular, we examine the degree distribution and clustering coefficient distribution for the rat  
 224 brain network to gain insight as to why this network gives such a significant improvement in the required  
 225 number of driven nodes when considering the fractional-order dynamical network model – see Figure 2  
 226 (b) and (c). We notice that the rat brain network has wide range of degrees and a fairly high clustering  
 227 coefficient. We conjecture that these properties play a role in achieving a high difference in driven nodes.

228 Using the progressive ChungLu method developed in [12], we generate 100 networks that are on average  
 229 similar in degree distribution to the rat brain network. From the results in Figure 2 (a), we see that the  
 230 mean and standard deviation of the difference in driven nodes for the generated networks drastically differ  
 231 the results for the original rat brain network. As a way to understand why we see this drastic difference in  
 232 results, we performed the Spearman Rank Test (Chapter 8.5, [13]), which tests whether any two real-valued  
 233 vectors of equal length are independent. In particular, the null hypothesis states that the two vectors are

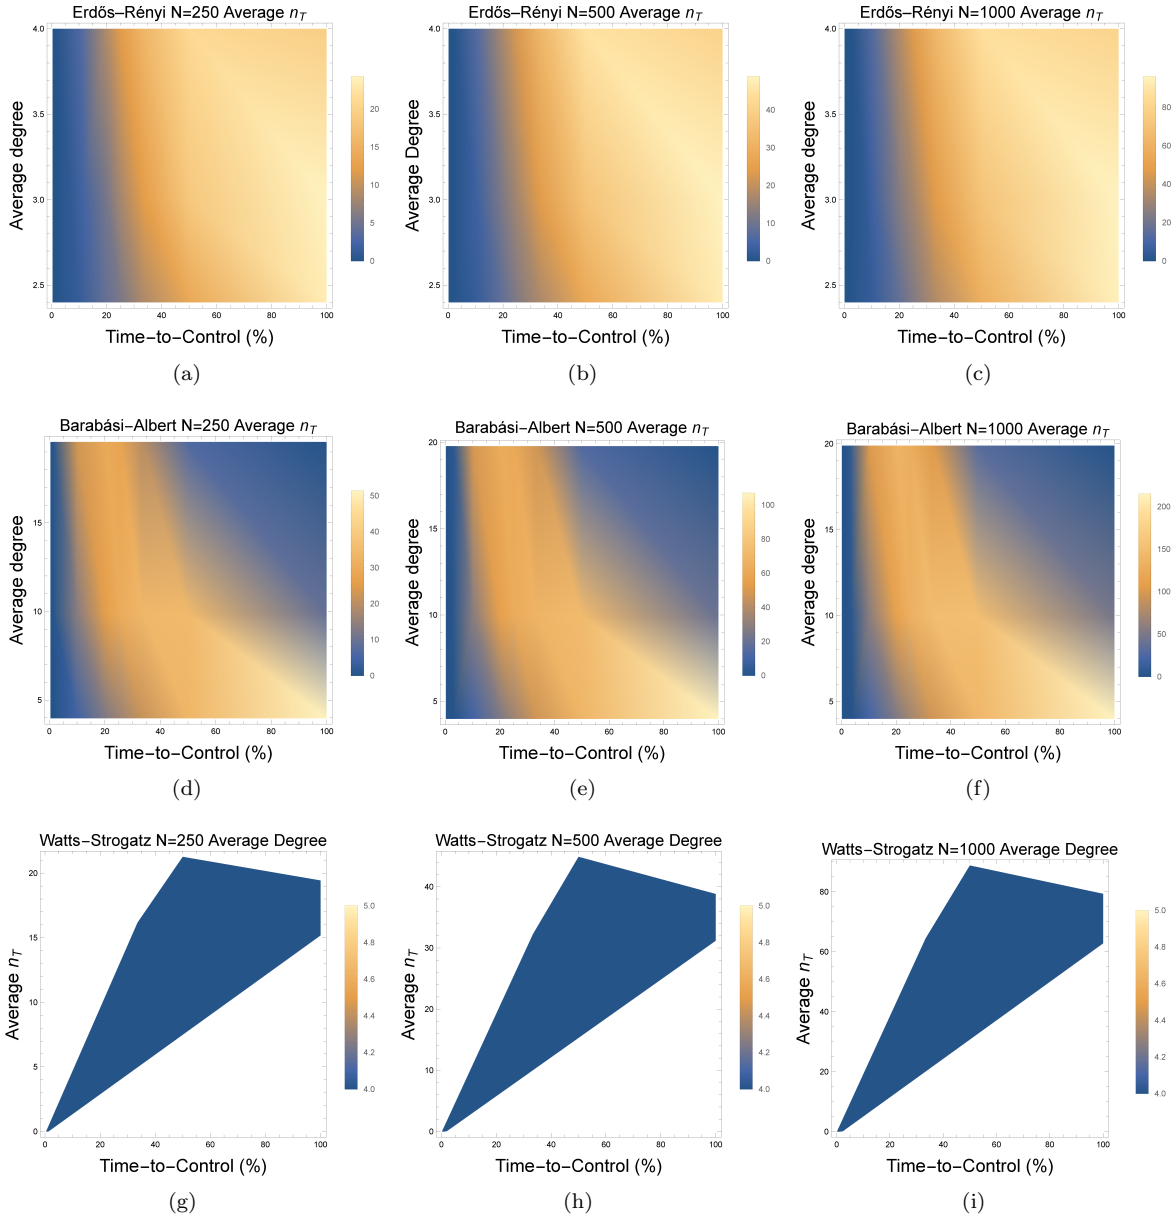

Figure 1: For networks of sizes 250, 500, and 1000 nodes, respectively, Figures (a), (b), and (c) show the average difference in the required number of driven nodes ( $n_T$ ) for networks of varying average degree distributions versus the time-to-control (%) for 100 realizations of Erdős-Rényi networks. For networks of sizes 250, 500, and 1000 nodes, respectively, Figures (d), (e), and (f) show the average difference in the required number of driven nodes ( $n_T$ ) for networks of varying average degree distributions versus the time-to-control (%) for 100 realizations of Barabási-Albert networks. For networks of sizes 250, 500, and 1000 nodes, respectively, Figures (g), (h), and (i) show the average degree of networks versus the required number of driven nodes ( $n_T$ ) across the time-to-control (%) for 100 realizations of Watts-Strogatz networks. In the case of the Watts-Strogatz networks, we notice that the average degree is the same for all of the networks.

234 indeed independent. Hence, if the p-value is large, then the null hypothesis is accepted, whereas if the  
 235 p-value is small, then the null hypothesis is rejected. For each of the 100 generated networks, we compare  
 236 the distribution of the in-degree, out-degree, and total degree for the generated network with those for the  
 237 rat brain network.



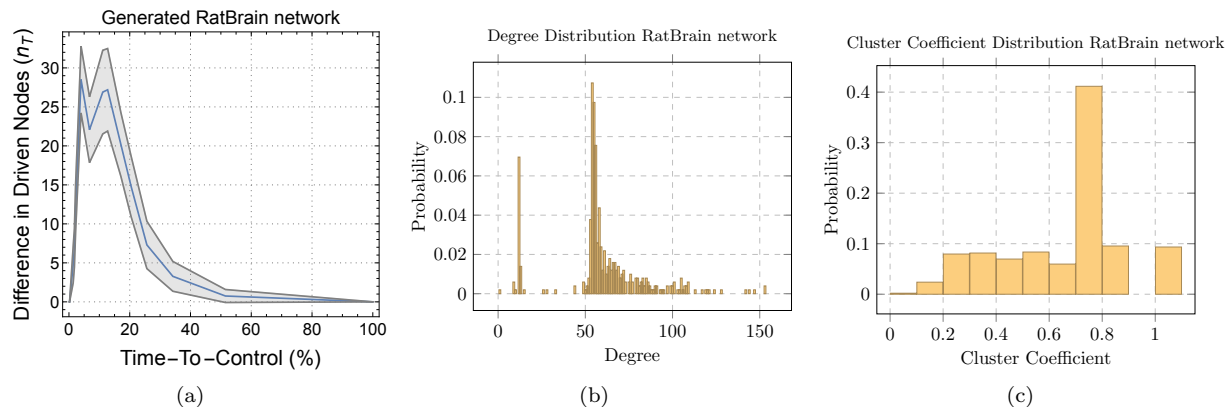

Figure 2: (a) shows the mean and standard deviation of the difference in driven nodes versus time-to-control for 100 networks generated from the rat brain network following the progressive Chung Lu method [12]. (b) shows the degree distribution for the original rat brain network. (c) shows the clustering coefficient for the original rat brain network.

238 First, we provide the results of the Spearman Rank Test when considering the in-degree distribution. With  
 239 99% confidence, only 55% of the generated networks have vertex in-degree distributions that are independent  
 240 of the vertex in-degree distribution for the rat brain network. With 95% confidence, 80% of the generated  
 241 networks have vertex in-degree distributions that are independent of the vertex in-degree distribution for the  
 242 rat brain network. With 90% confidence, 87% of the generated networks have vertex in-degree distributions  
 243 that are independent of the vertex in-degree distribution for the rat brain network. Therefore, we can say  
 244 with high confidence that most of the generated networks have in-degree distributions that are independent  
 245 from the in-degree distribution of the rat brain network. This may provide an explanation as to why the  
 246 difference in the number of driven nodes needed for the generated networks differs drastically from difference  
 247 in the required number of driven nodes for the rat brain network.

248 Next, we provide the results of the Spearman Rank Test when considering the out-degree distribution.  
 249 With 99% confidence, only 26% of the generated networks have vertex out-degree distributions that are  
 250 independent of the vertex out-degree distribution for the rat brain network. With 95% confidence, 52% of  
 251 the generated networks have vertex out-degree distributions that are independent of the vertex out-degree  
 252 distribution for the rat brain network. With 90% confidence, 63% of the generated networks have vertex  
 253 out-degree distributions that are independent of the vertex out-degree distribution for the rat brain network.  
 254 Surprisingly, we can say with high confidence that very few of the generated networks have out-degree  
 255 distributions that are independent from the out-degree distribution of the rat brain network.

256 Finally, we provide the results of the Spearman Rank Test when considering the total degree distribution.  
 257 With 99% confidence, 70% of the generated networks have total degree distributions that are independent of  
 258 the total degree distribution for the rat brain network. With 95% confidence, 94% of the generated networks  
 259 have total degree distributions that are independent of the total degree distribution for the rat brain network.  
 260 With 90% confidence, 94% of the generated networks have total degree distributions that are independent  
 261 of the total degree distribution for the rat brain network. Therefore, we can say with high confidence that  
 262 more than 70% of the generated networks have total degree distributions that are independent from the total  
 263 degree distribution of the rat brain network. This provides evidence to support that the difference in the  
 264 number of driven nodes needed for the generated networks would differ drastically from the difference in the  
 265 required number of driven nodes for the rat brain network.

## 266 References

- 267 [1] I. Podlubny, "Chapter 2 - fractional derivatives and integrals," in *Fractional Differential Equations: An*  
 268 *Introduction to Fractional Derivatives, Fractional Differential Equations, to Methods of their Solution*

- 269 *and some of their Applications*, ser. Mathematics in Science and Engineering. Elsevier, 1999, vol. 198,  
270 pp. 41–119. [Online]. Available: <https://www.sciencedirect.com/science/article/pii/S0076539299800216>
- 271 [2] A. Dzieliński and D. Sierociuk, “Adaptive Feedback Control of Fractional Order Discrete State-Space  
272 Systems,” in *Proceedings of the International Conference on Computational Intelligence for Modelling,  
273 Control and Automation*, vol. 1, Nov 2005, pp. 804–809.
- 274 [3] S. Guermah, S. Djennoune, and M. Bettayeb, “Controllability and observability of linear discrete-time  
275 fractional-order systems,” *International Journal of Applied Mathematics and Computer Science*, vol. 18,  
276 no. 2, pp. 213–222, 2008.
- 277 [4] S. Pequito, P. Bogdan, and G. J. Pappas, “Minimum number of probes for brain dynamics observability,”  
278 in *Proceedings of the 54th IEEE Conference on Decision and Control*. IEEE, 2015, pp. 306–311.
- 279 [5] E. Reed, S. Chatterjee, G. Ramos, P. Bogdan, and S. Pequito, “Fractional cyber-neural systems—a  
280 brief survey,” *Annual Reviews in Control*, 2022.
- 281 [6] G. Ramos, A. P. Aguiar, and S. Pequito, “An overview of structural systems theory,” *Automatica*, vol.  
282 140, p. 110229, 2022.
- 283 [7] S. Pequito, S. Kar, and A. P. Aguiar, “A framework for structural input/output and control configuration  
284 selection in large-scale systems,” *IEEE Transactions on Automatic Control*, vol. 61, no. 2, pp. 303–318,  
285 2015.
- 286 [8] R. Tarjan, “Depth-first search and linear graph algorithms,” *SIAM Journal on Computing*, vol. 1, no. 2,  
287 pp. 146–160, 1972.
- 288 [9] G. Karypis and V. Kumar, “A fast and high quality multilevel scheme for partitioning irregular graphs,”  
289 *SIAM Journal on Scientific Computing*, vol. 20, no. 1, pp. 359–392, 1998.
- 290 [10] E. A. Reed, G. Ramos, P. Bogdan, and S. Pequito, “A scalable distributed dynamical systems approach  
291 to compute the strongly connected components and diameter of networks,” *IEEE Transactions on  
292 Automatic Control*, 2022.
- 293 [11] B. W. Kernighan and S. Lin, “An efficient heuristic procedure for partitioning graphs,” *The Bell System  
294 Technical Journal*, vol. 49, no. 2, pp. 291–307, 1970.
- 295 [12] G. Ramos and S. Pequito, “Generating complex networks with time-to-control communities,” *PloS One*,  
296 vol. 15, no. 8, p. e0236753, 2020.
- 297 [13] M. Hollander, D. A. Wolfe, and E. Chicken, *Nonparametric statistical methods*. John Wiley & Sons,  
298 2013.
